# Supplementary figures and images for: Nitrogen substitutional defects in silicon. A quantum mechanical investigation of the structural, electronic and vibrational properties
Source: Royal Society of Chemistry journal article supplement (doi:10.1039/c9cp03185e), 2019-01-01

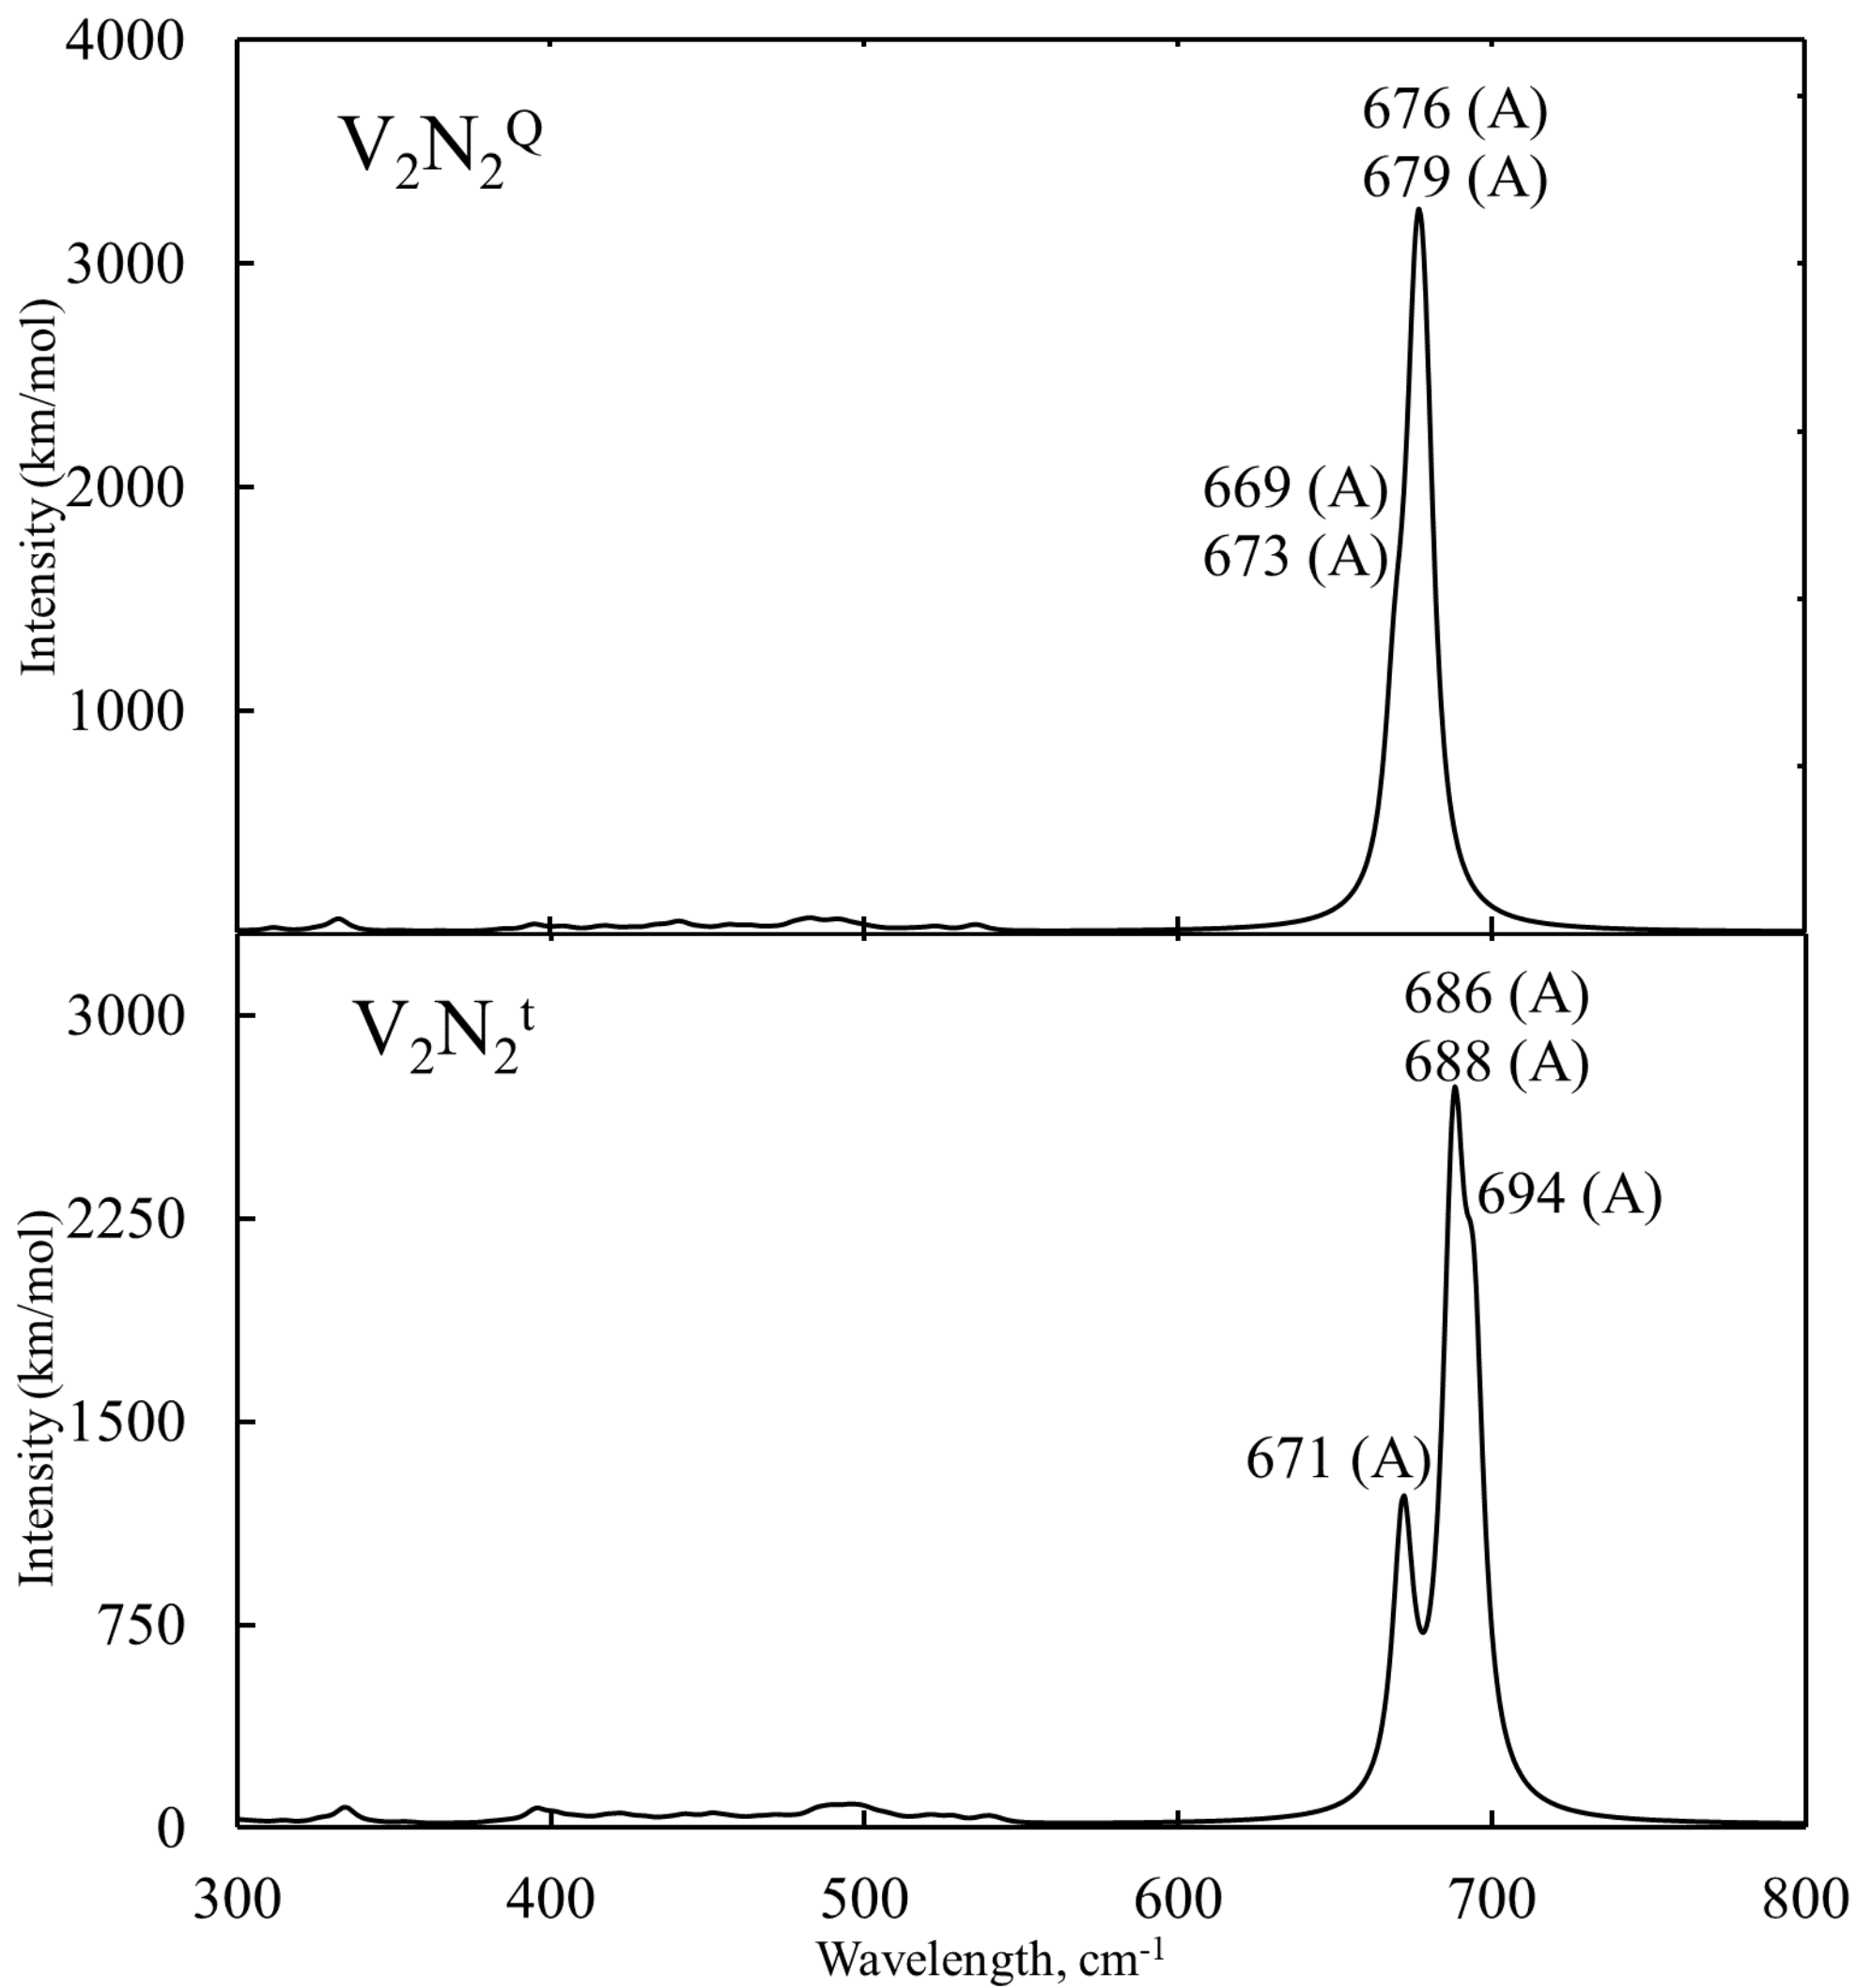

Supplement: c9cp03185e1.zip [file c9cp03185e1.zip]

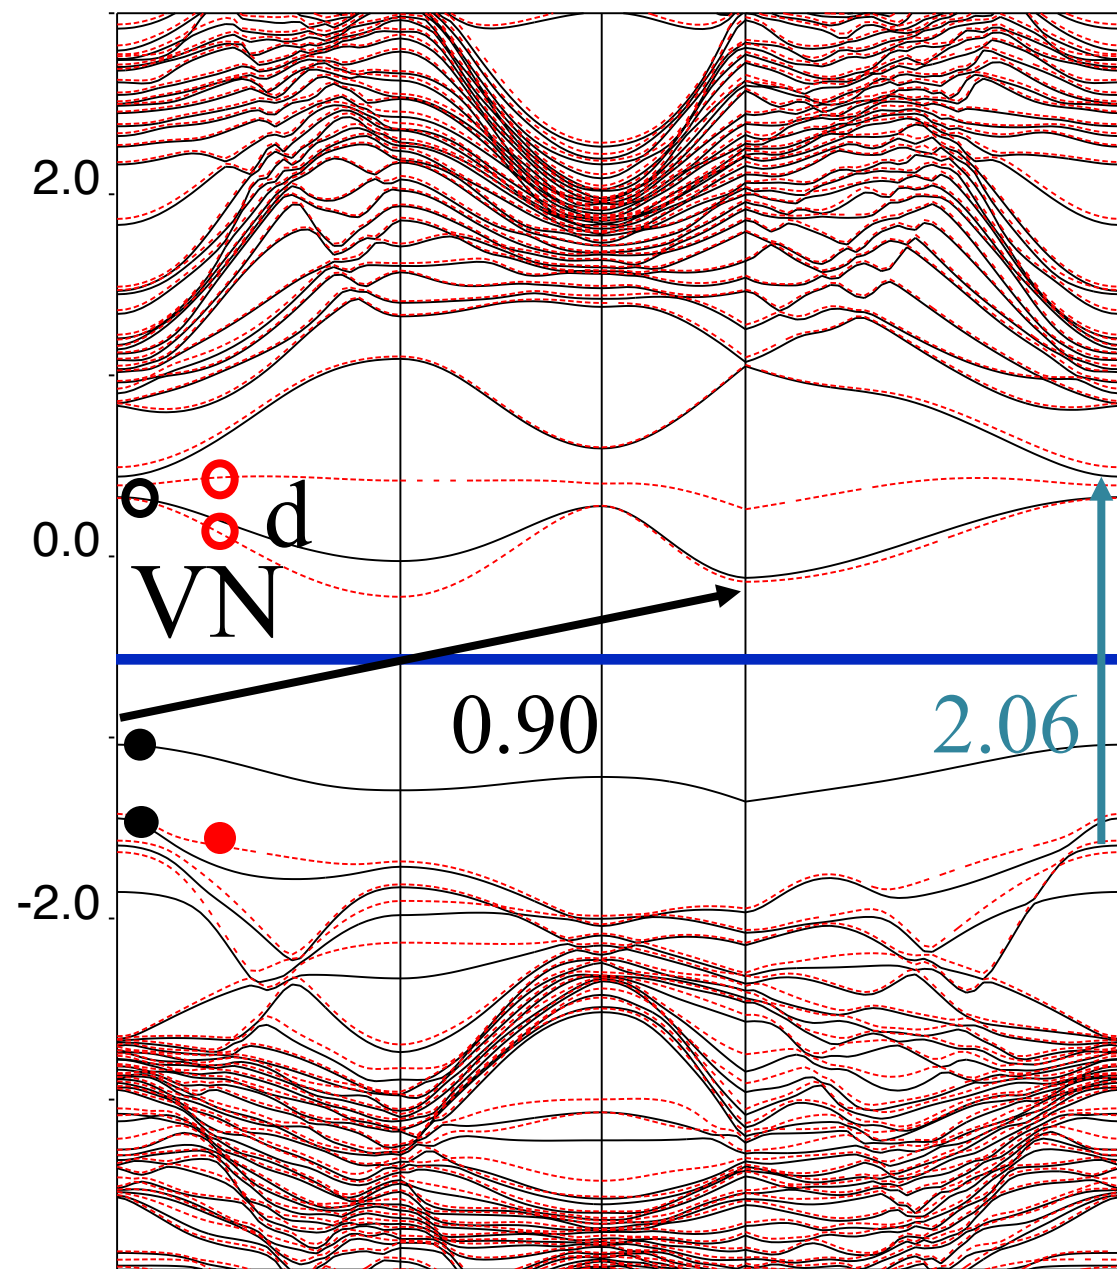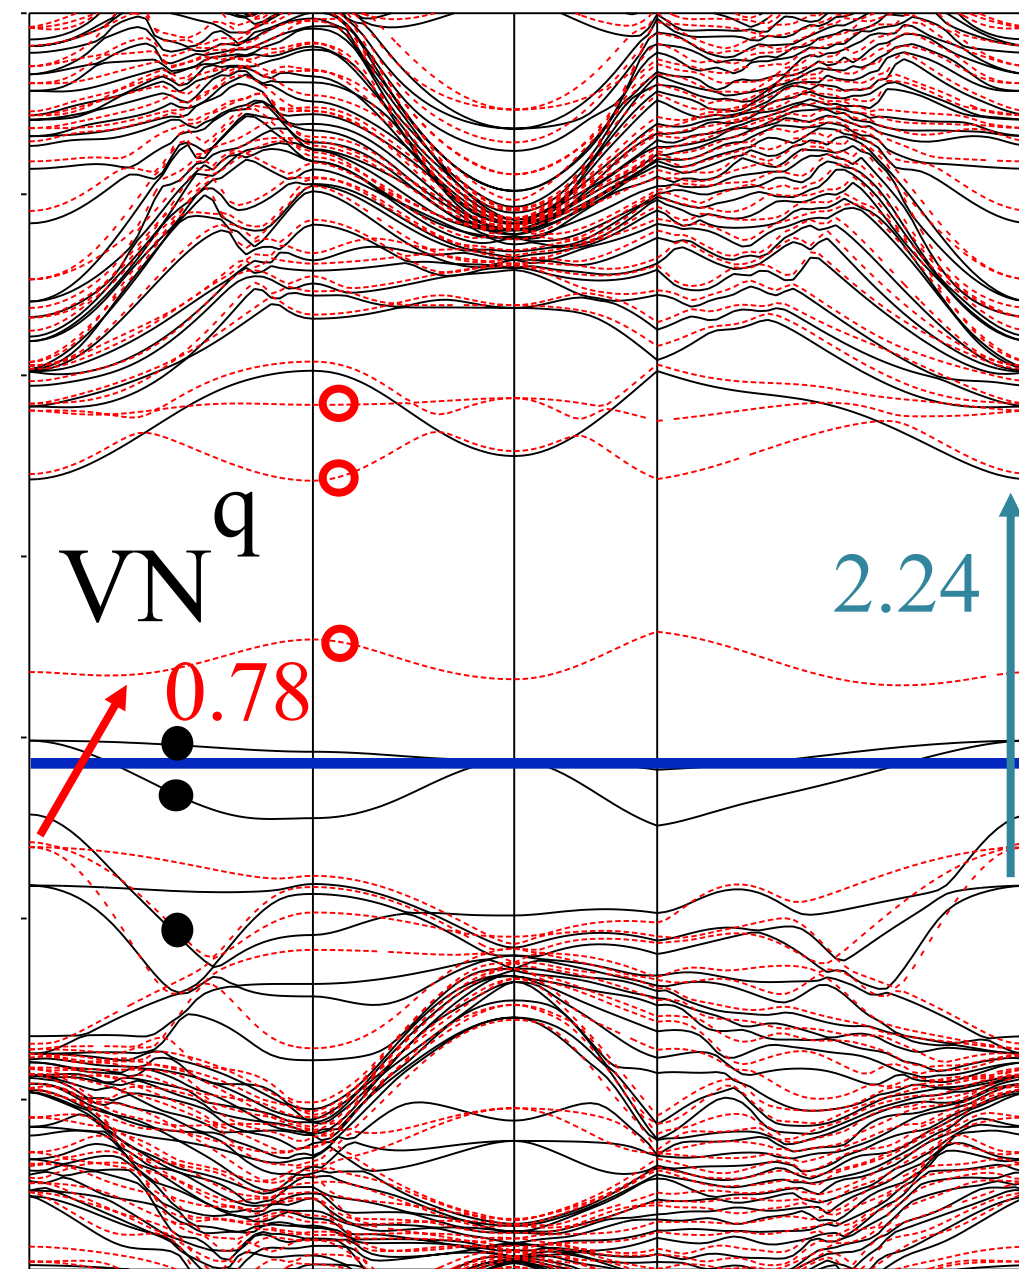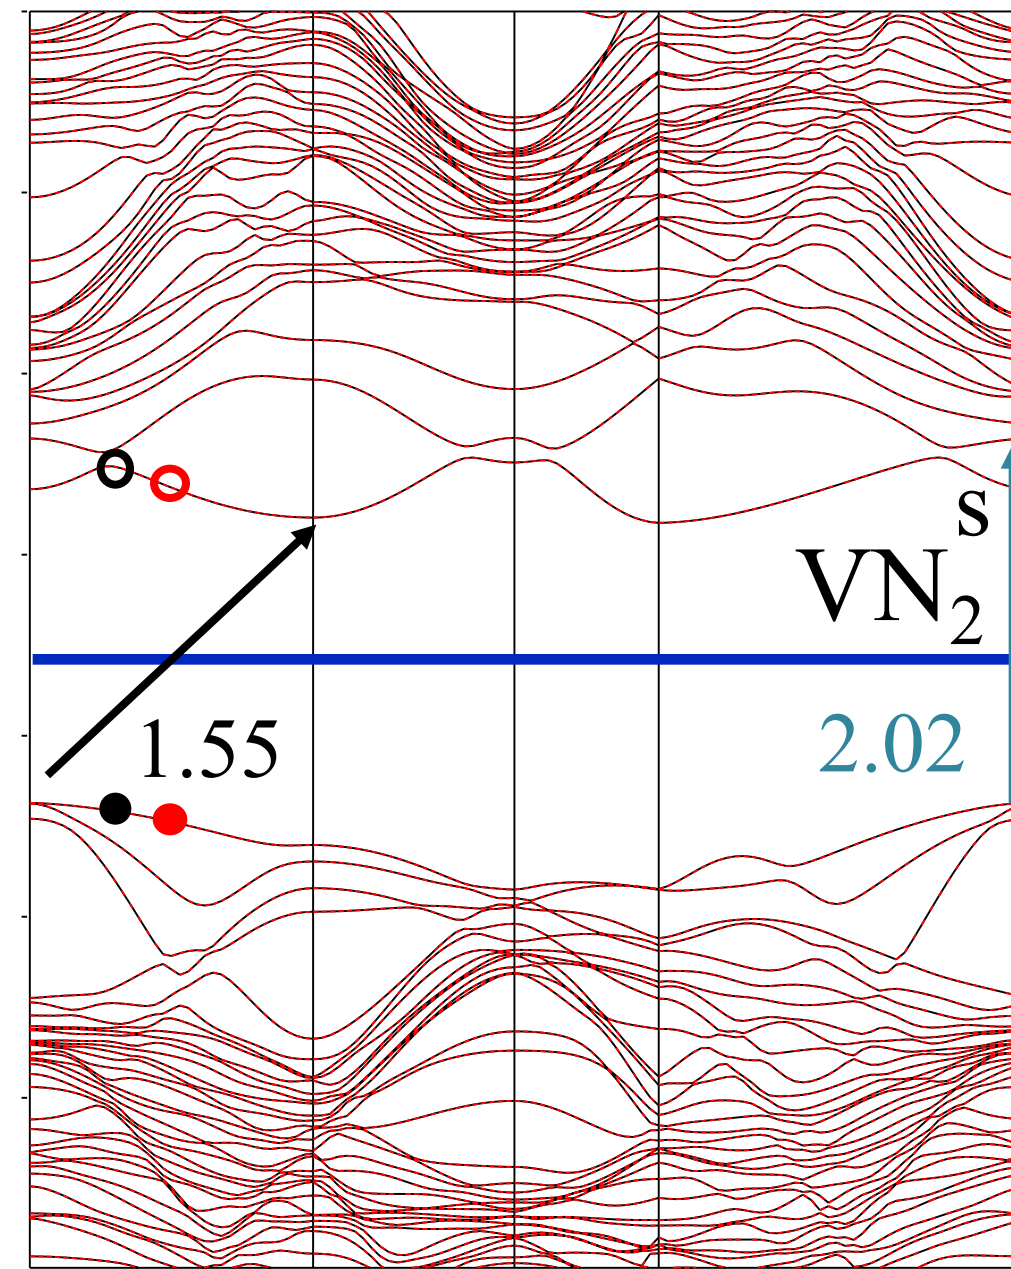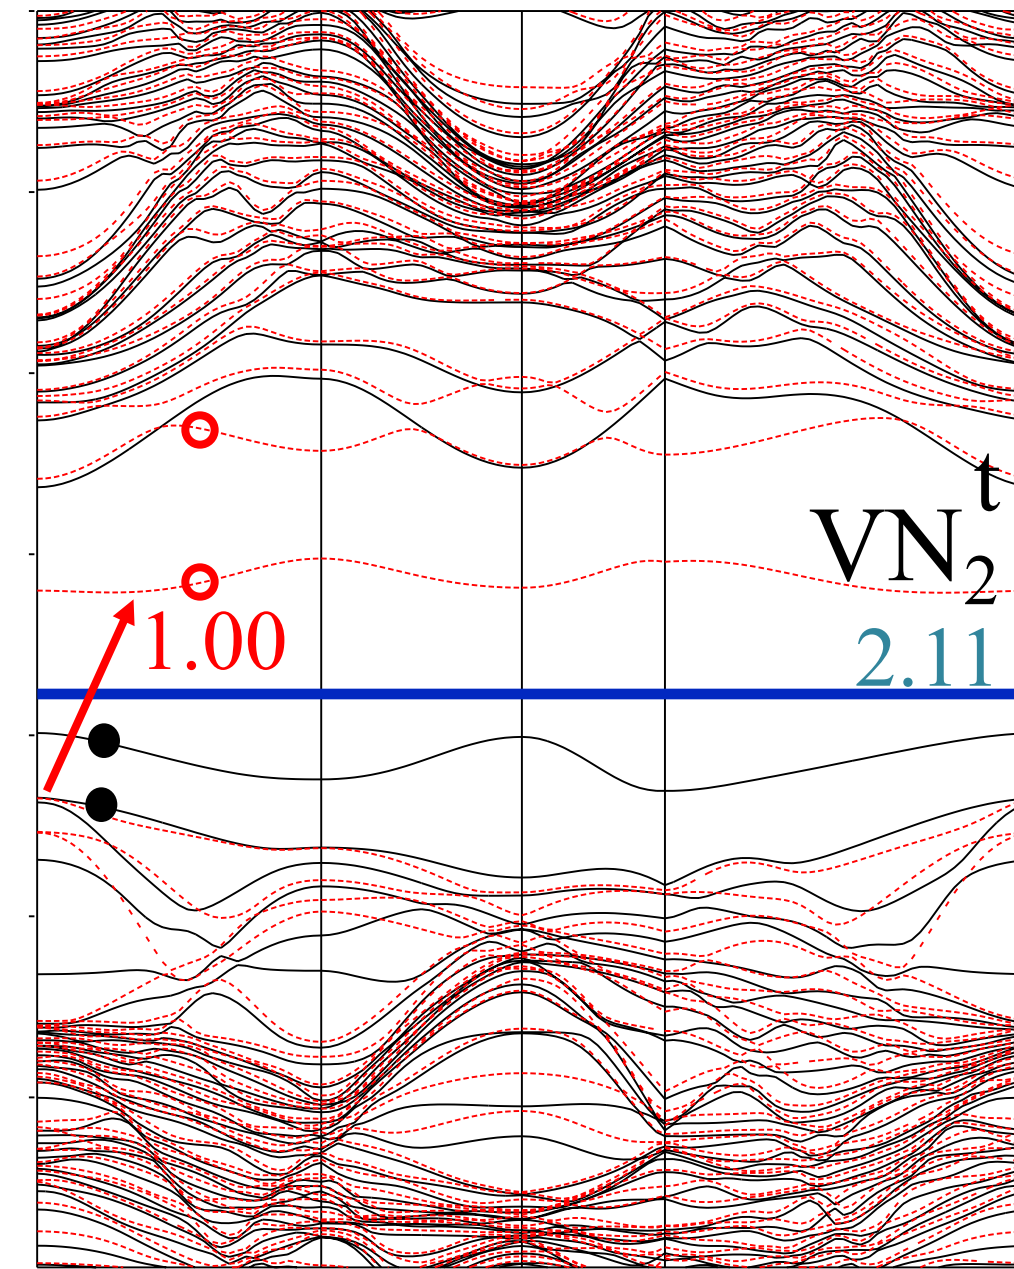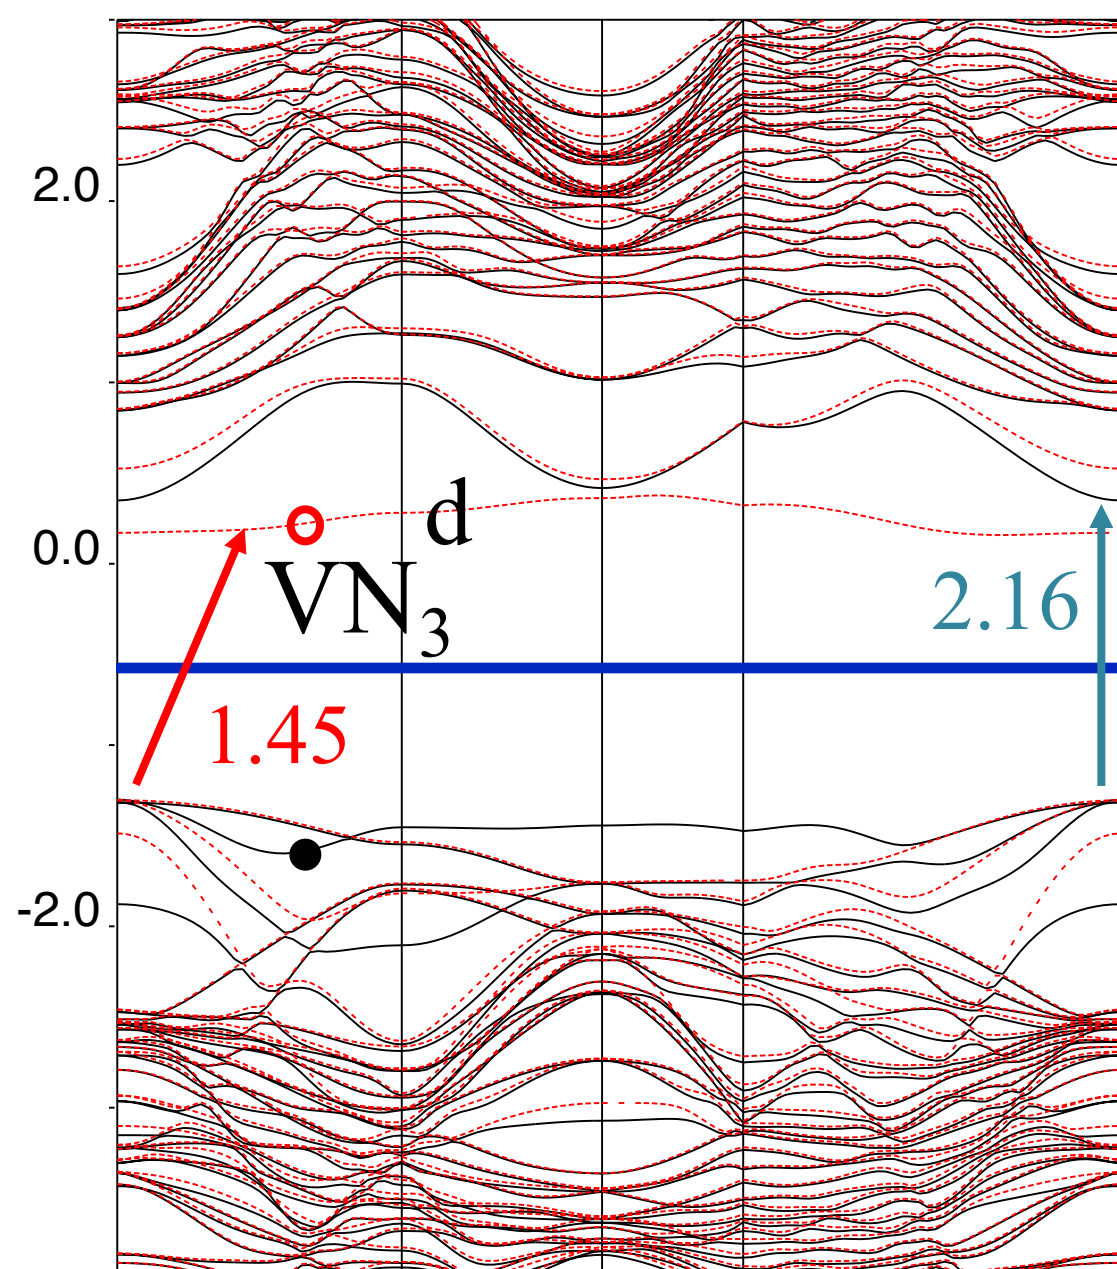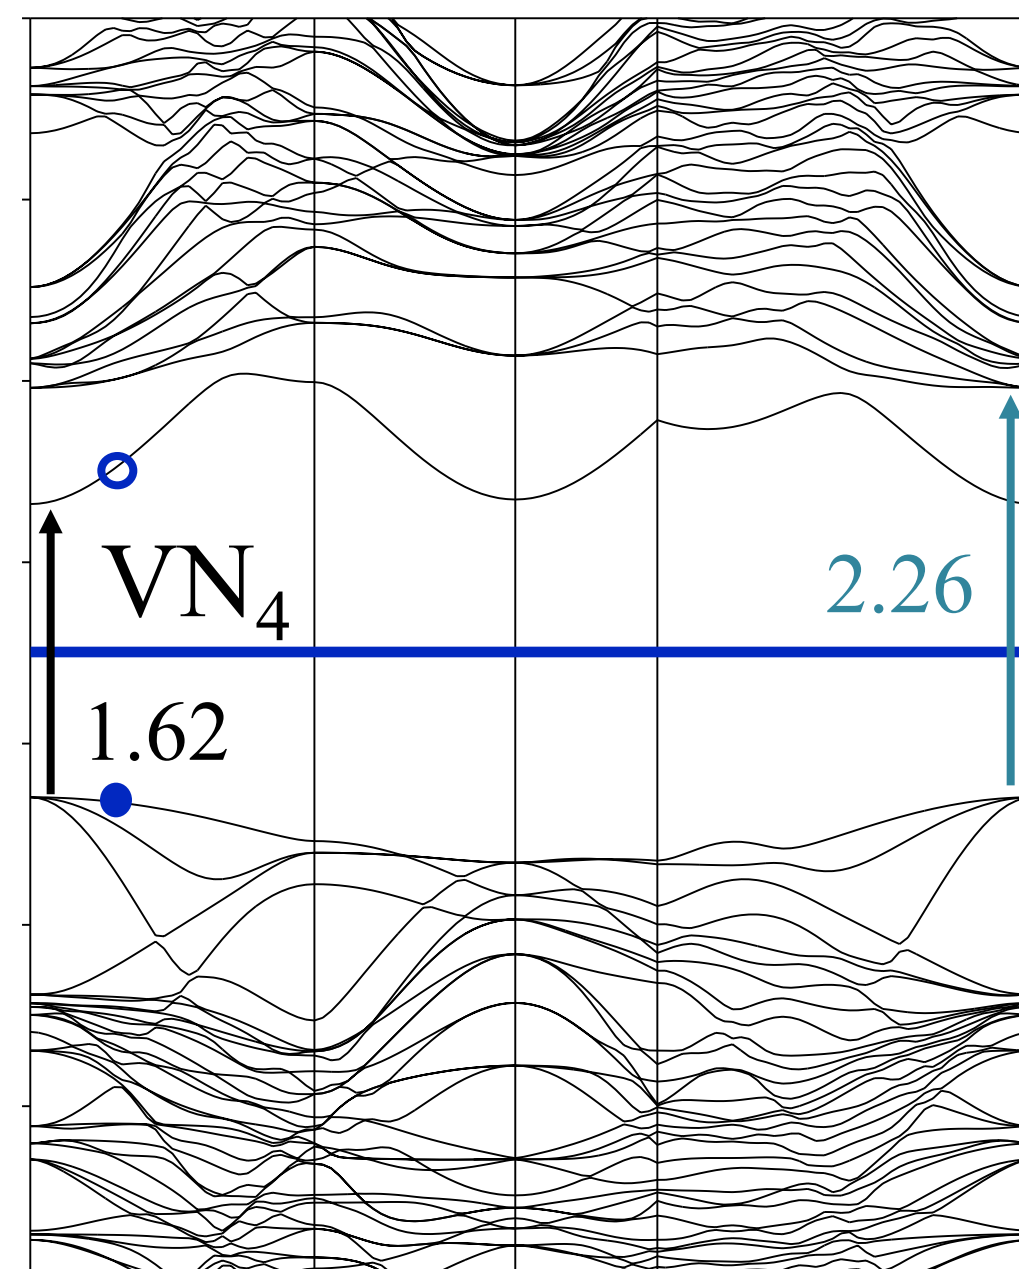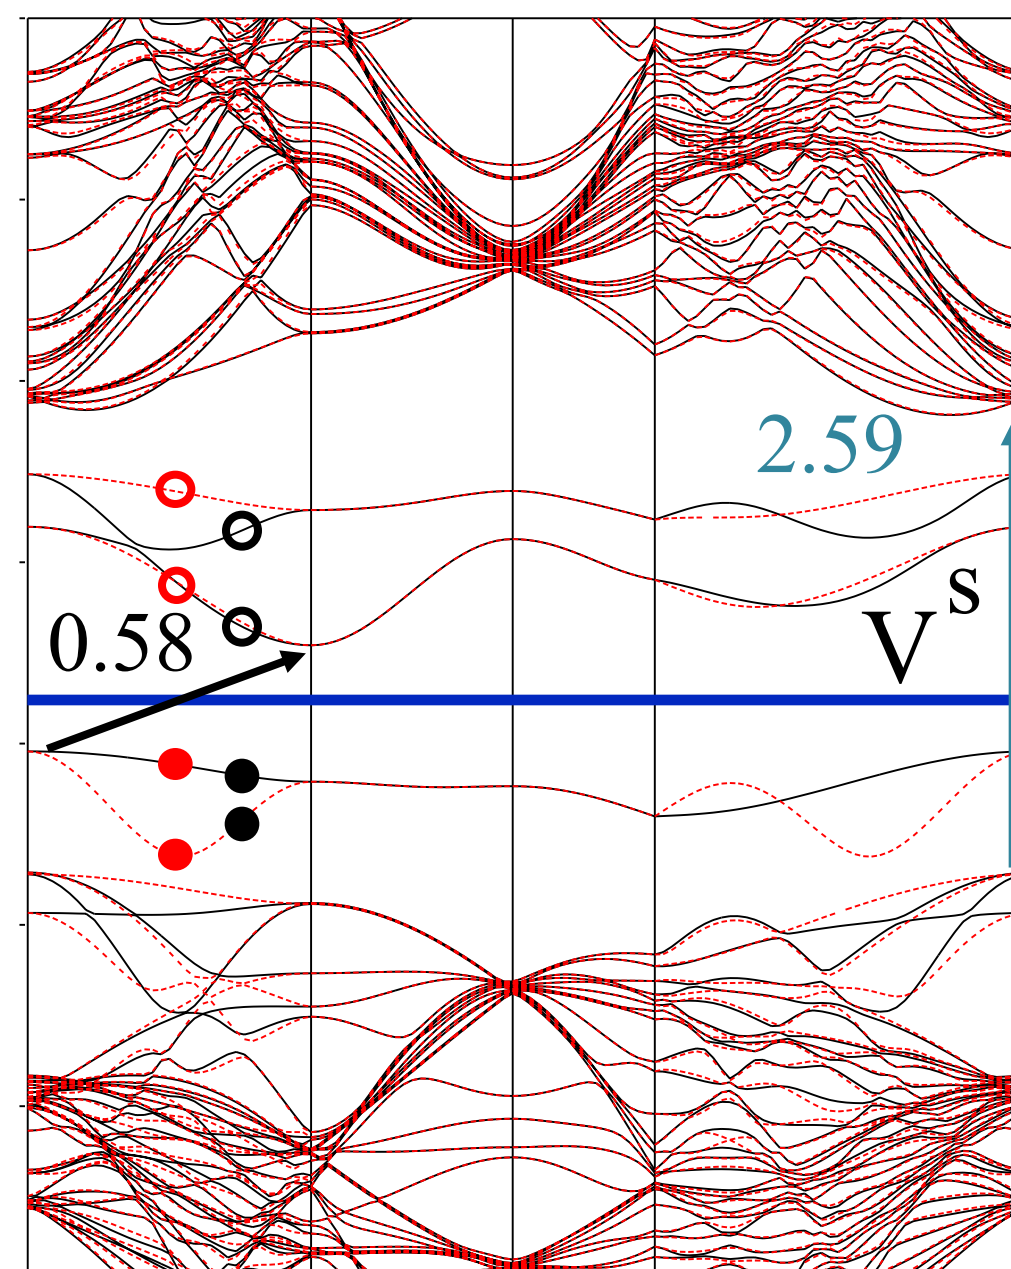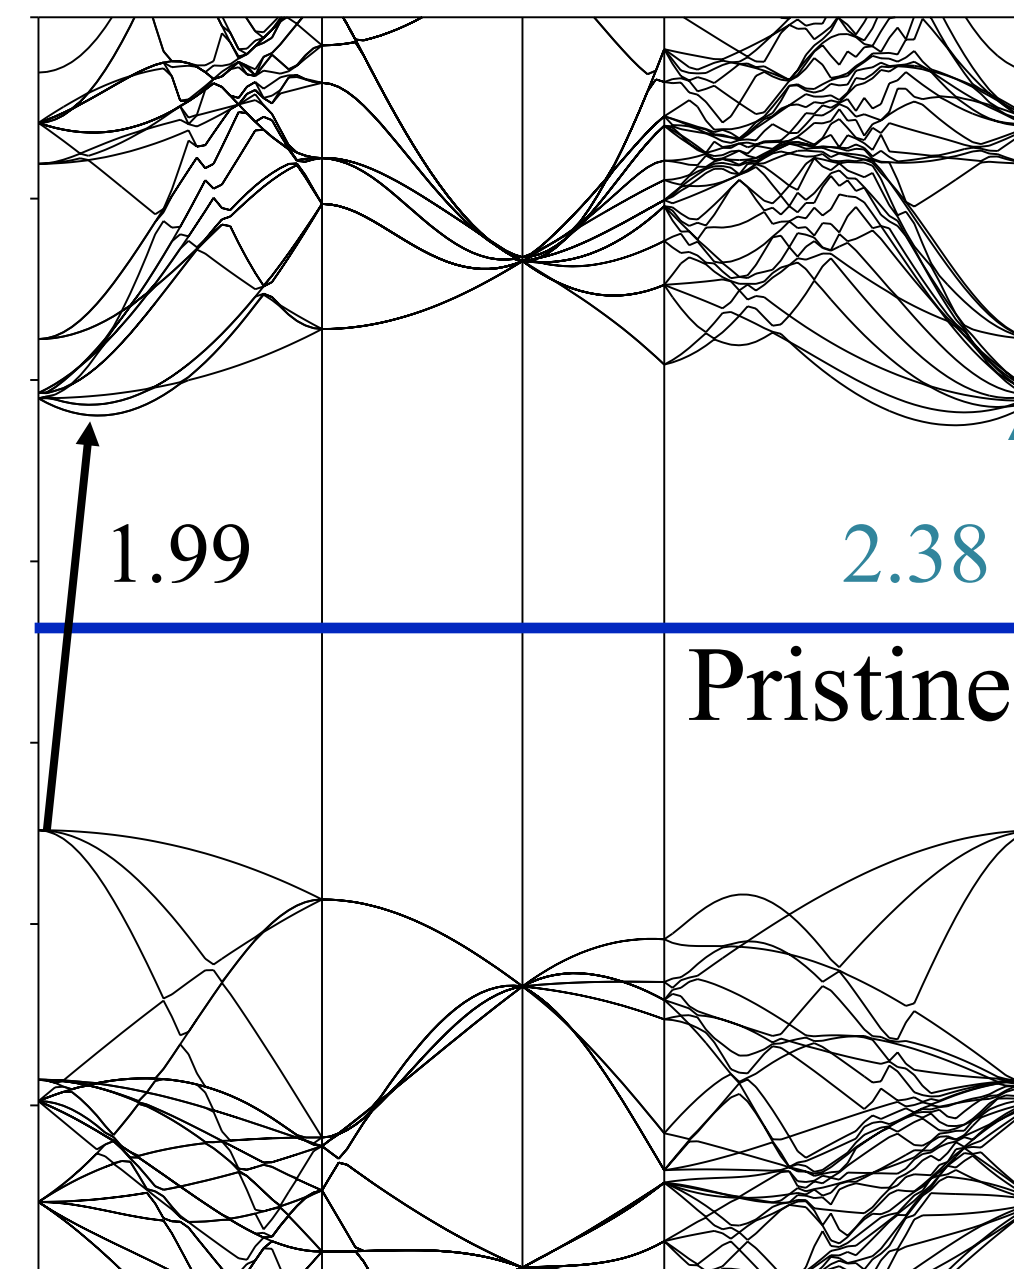

$\Gamma$

X

L

W

$\Gamma$

$\Gamma$

X

L

W

$\Gamma$

$\Gamma$

X

L

W

$\Gamma$

$\Gamma$

X

L

W

$\Gamma$

Supplement: c9cp03185e1.zip [file c9cp03185e1.zip]

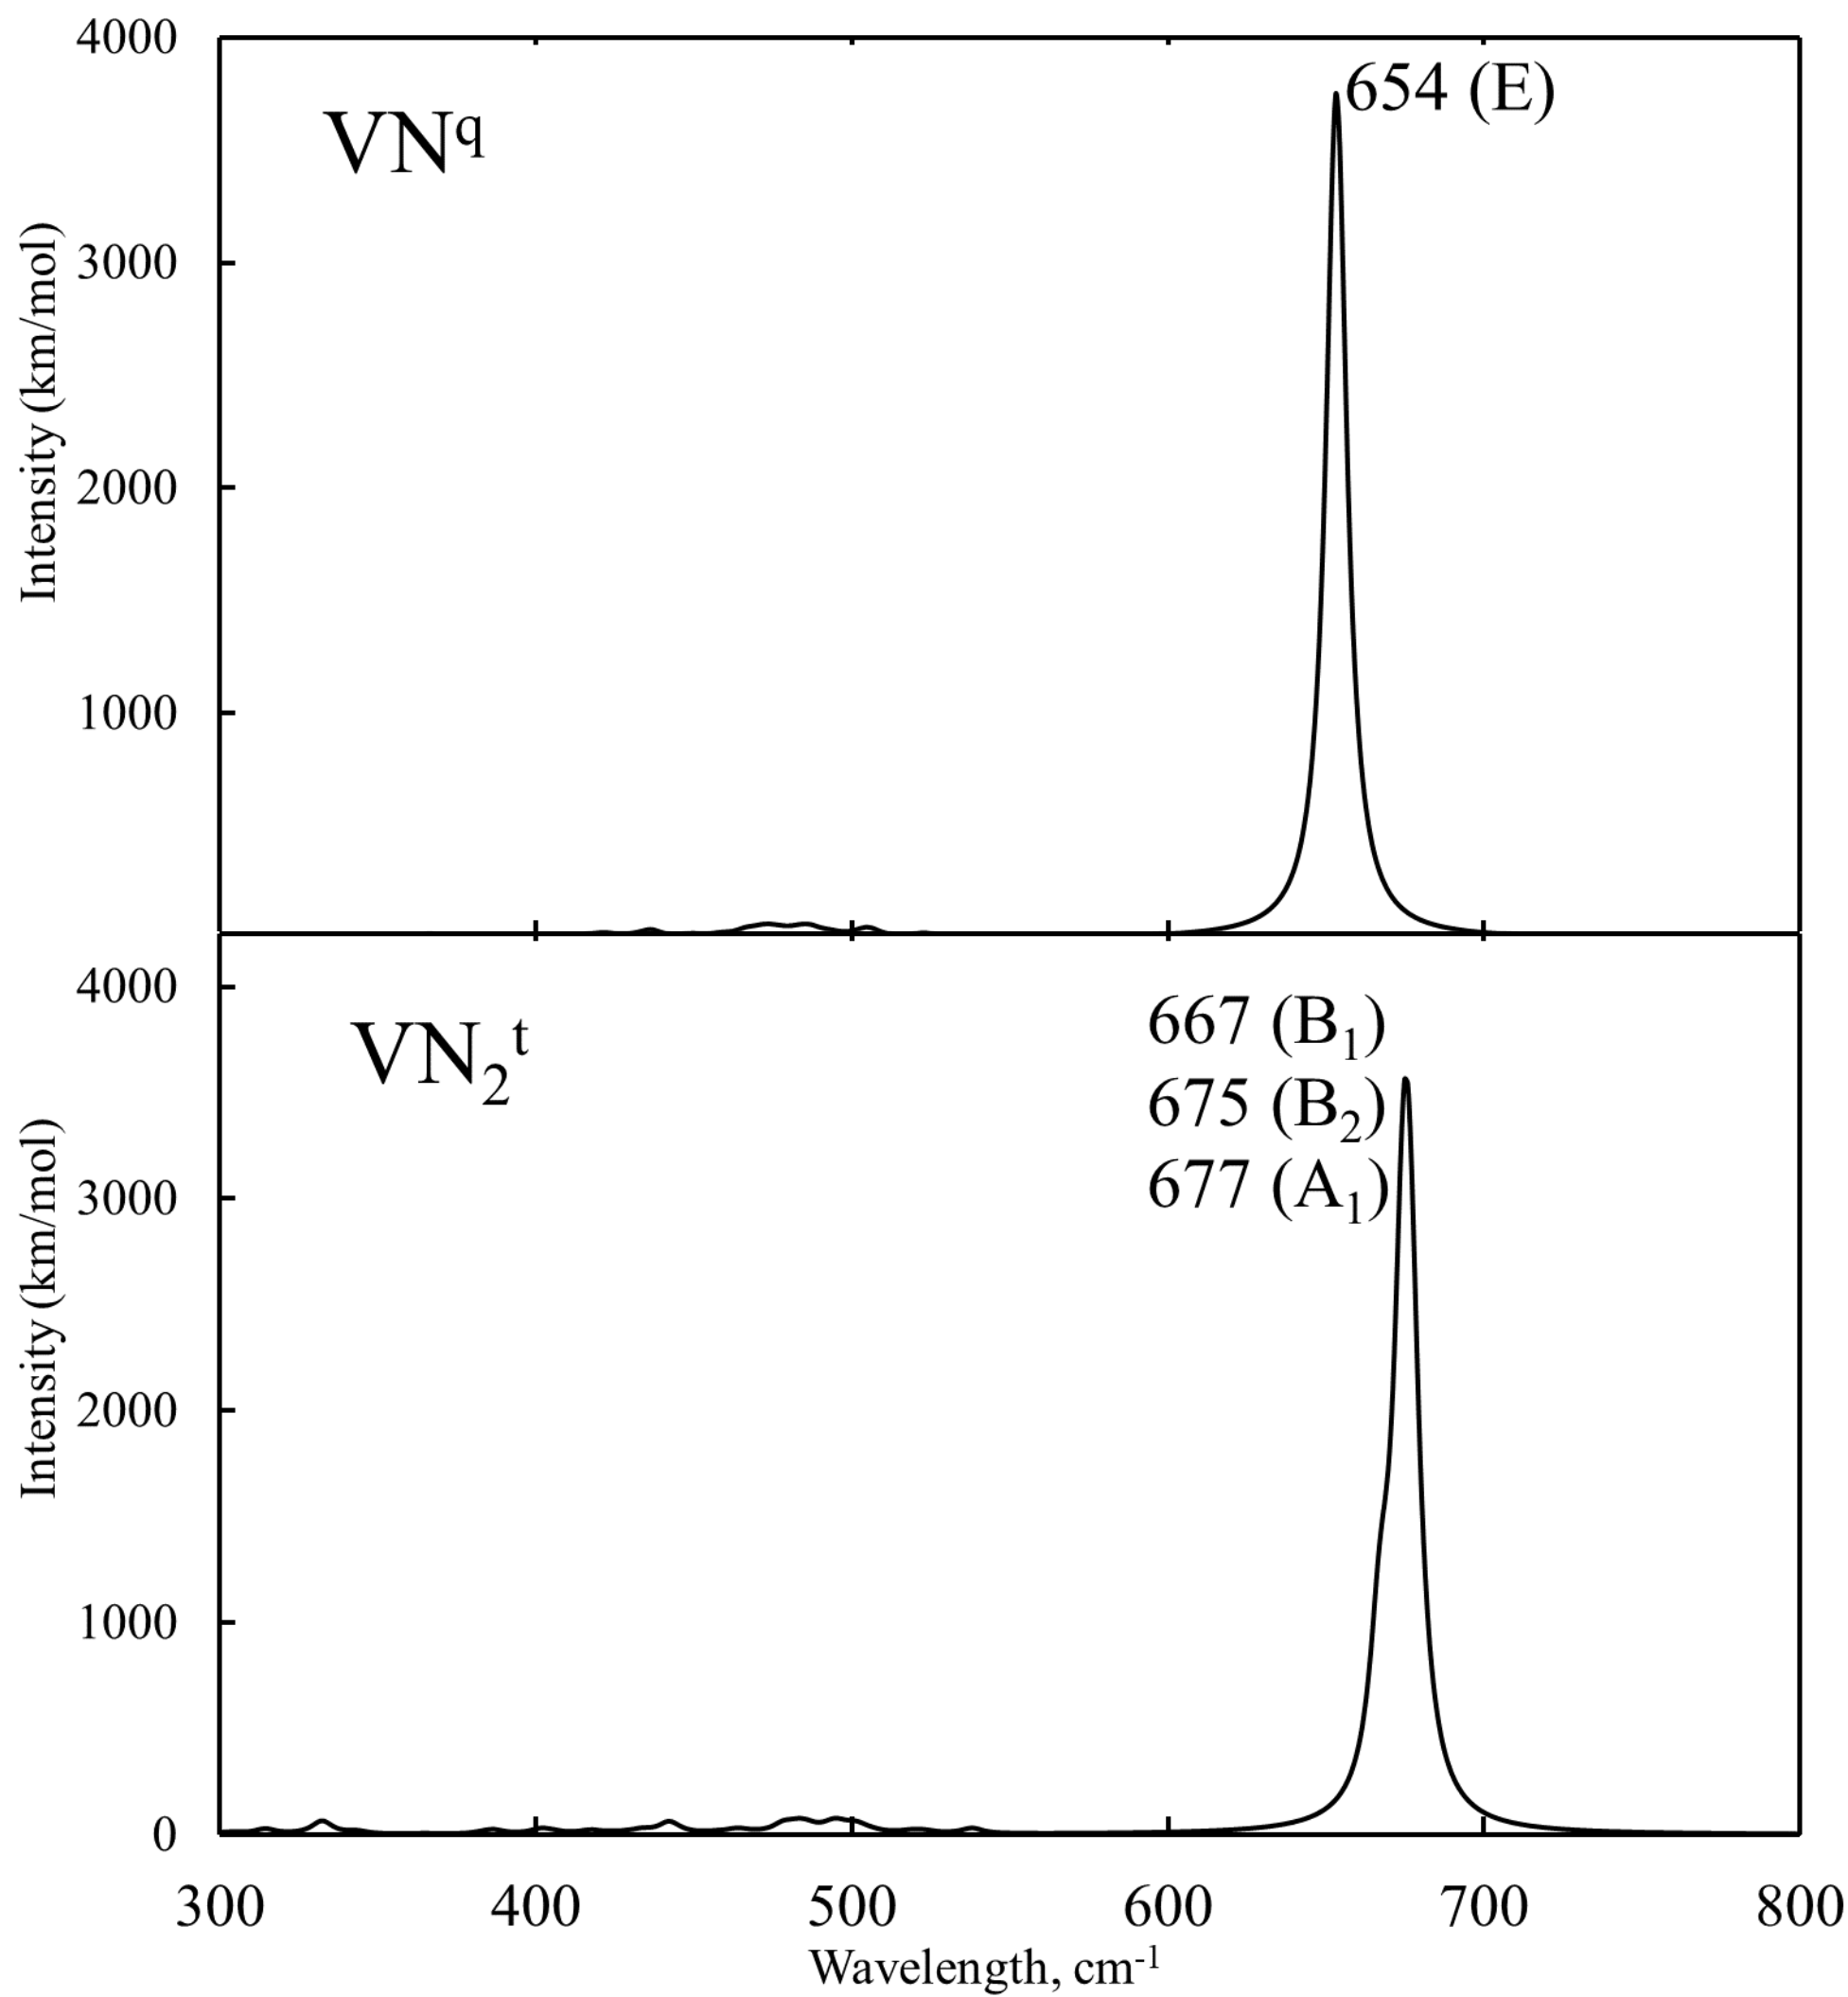

Supplement: c9cp03185e1.zip [file c9cp03185e1.zip]

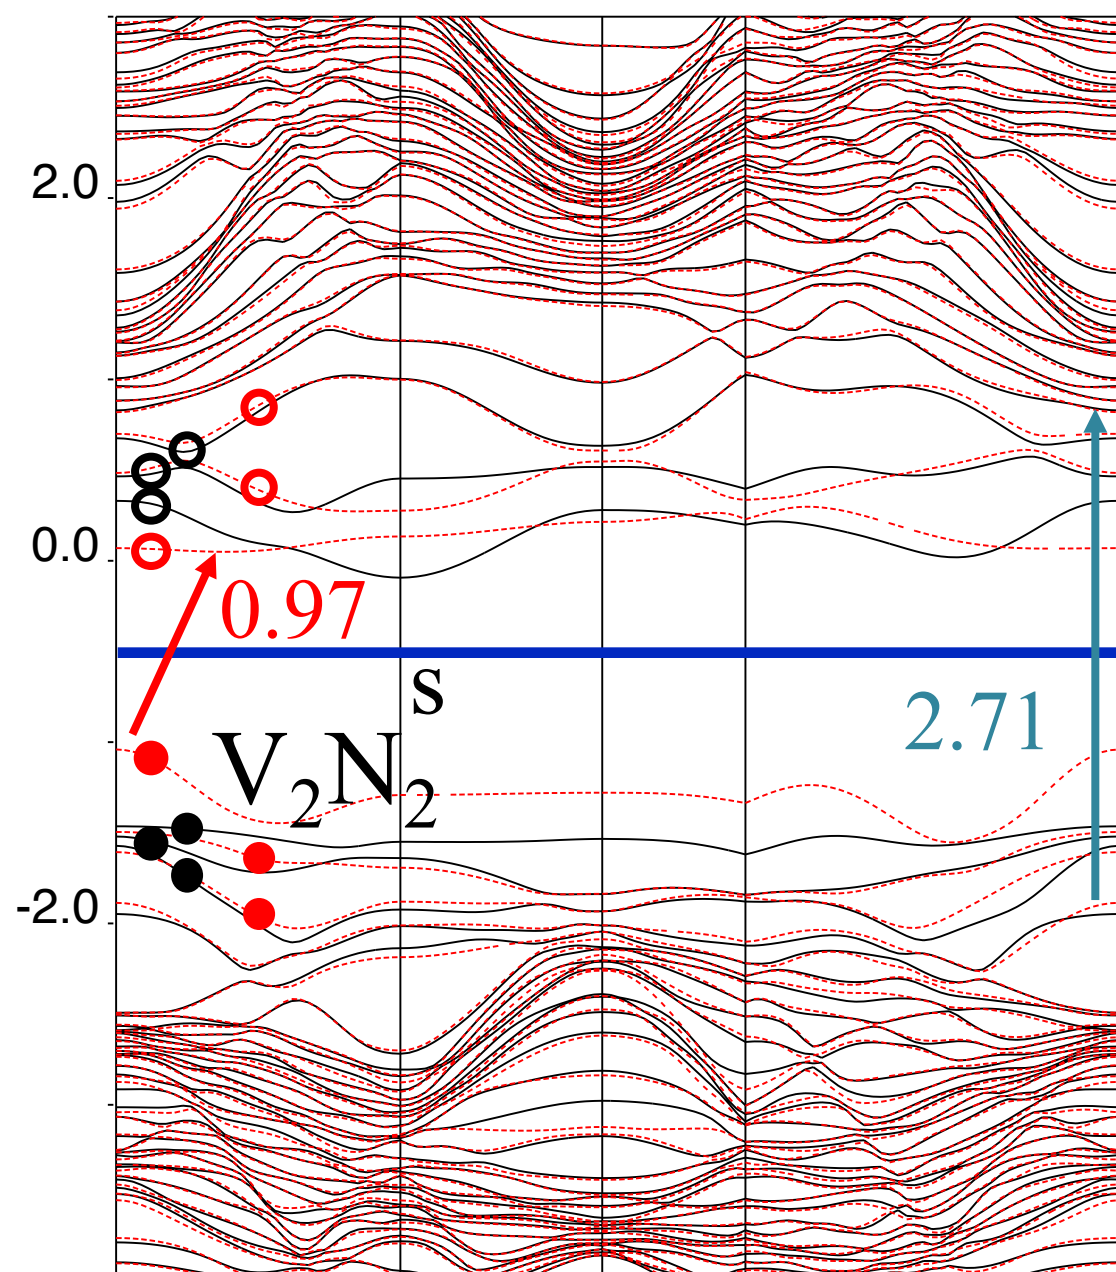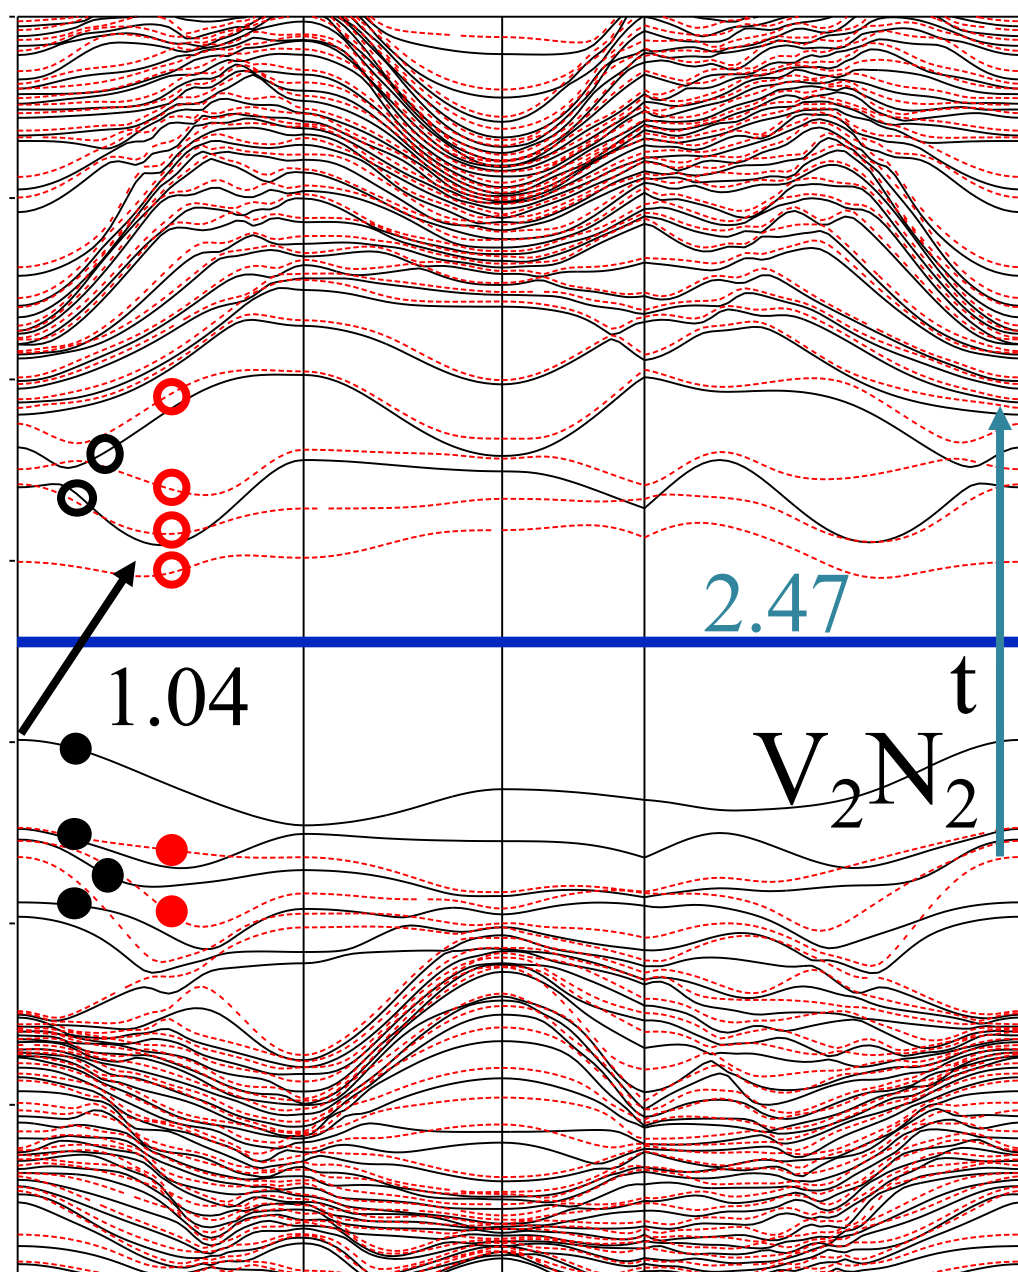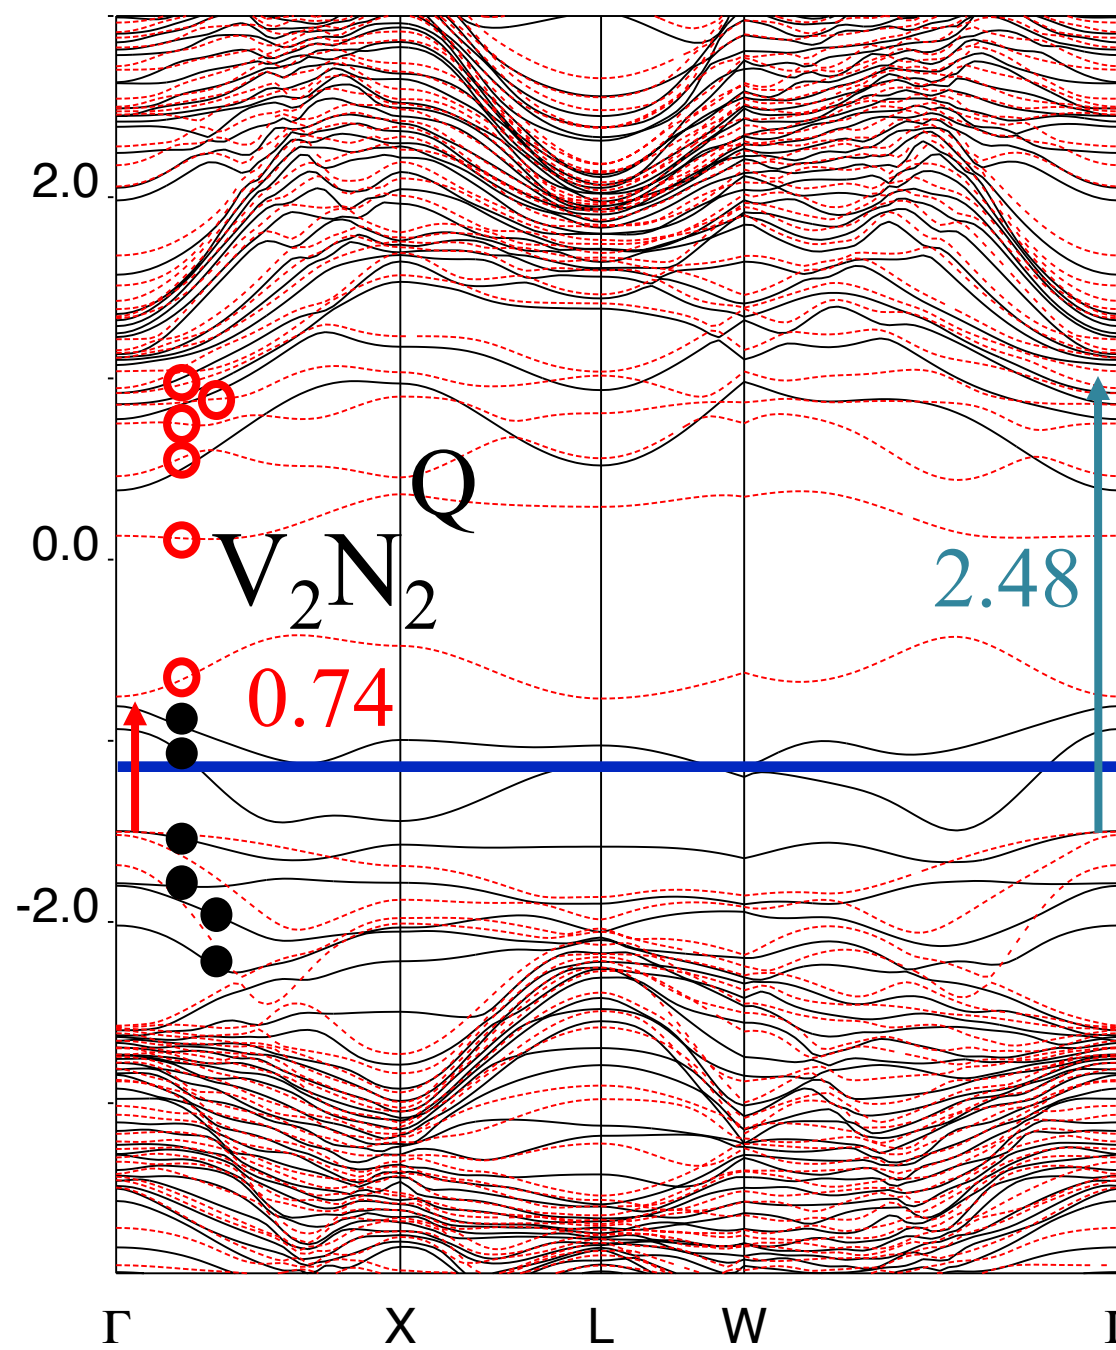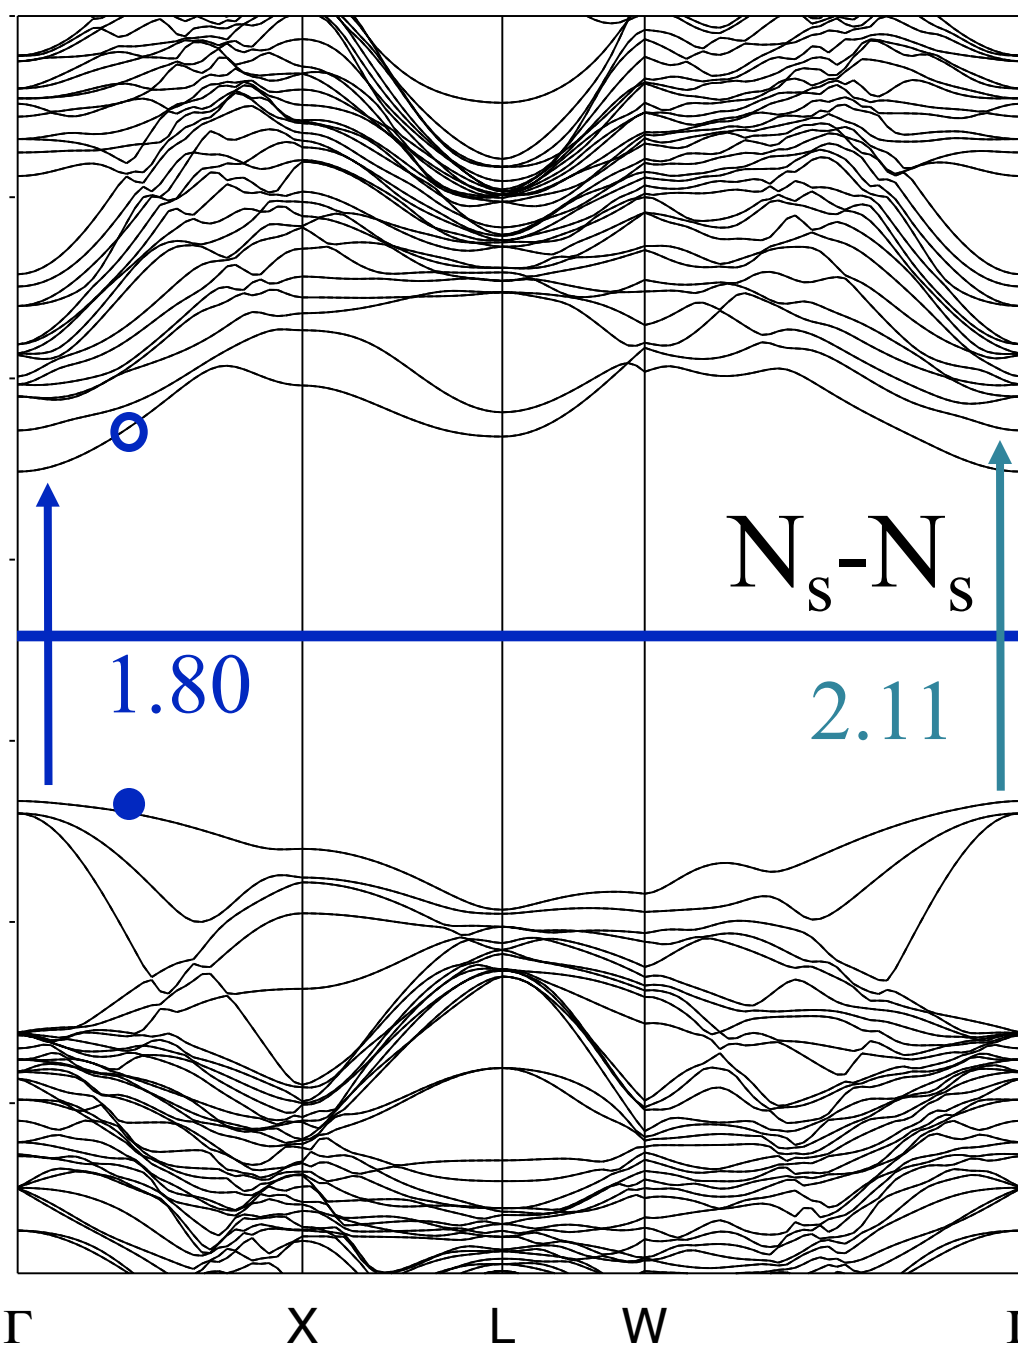

Supplement: c9cp03185e1.zip [file c9cp03185e1.zip]
